# Supplementary material for: Bulk preparation of holey graphene via controlled catalytic oxidation
Source: Royal Society of Chemistry journal article supplement (doi:10.1039/c3nr02135a), 2013-01-01
Supplement: c3nr02135a.pdf [file c3nr02135a.pdf]

-- Supporting Information --

## Bulk Preparation of Holey Graphene via Controlled Catalytic Oxidation

Yi Lin,<sup>\*a</sup> Kent A. Watson,<sup>a</sup> Jae-Woo Kim,<sup>a</sup> David W. Baggett,<sup>b</sup> Dennis C. Working<sup>b</sup> and John W. Connell<sup>b</sup>

<sup>a</sup> National Institute of Aerospace, 100 Exploration Way, Hampton, VA 23666-6147, USA. Tel: 1 757 864 2219; <sup>b</sup> Mail Stop 226, Advanced Materials and Processing Branch, NASA Langley Research Center, Hampton, VA 23681-2199, USA

\*E-mail: [yi.lin@nianet.org](mailto:yi.lin@nianet.org)

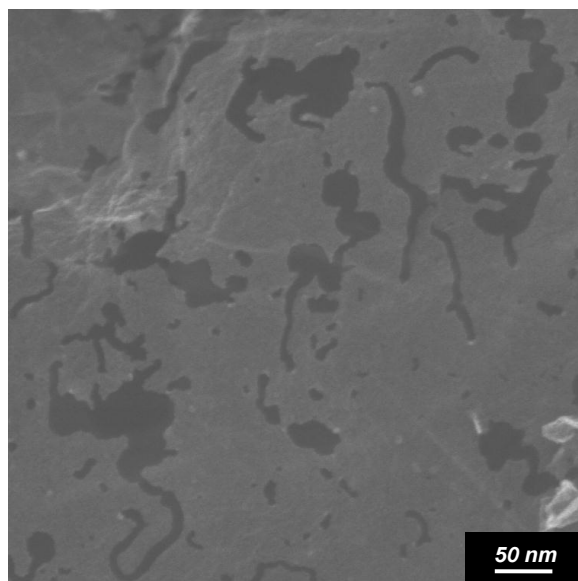

**Figure S1.** An SEM image of a (Ag-G)<sub>10</sub> sample subjected to thermal treatment at 300 °C in air for 10 h. Very long and irregular Ag-etched tracks can be seen; most catalytic Ag nanoparticles in this region had probably dissociated from the graphene sheet.

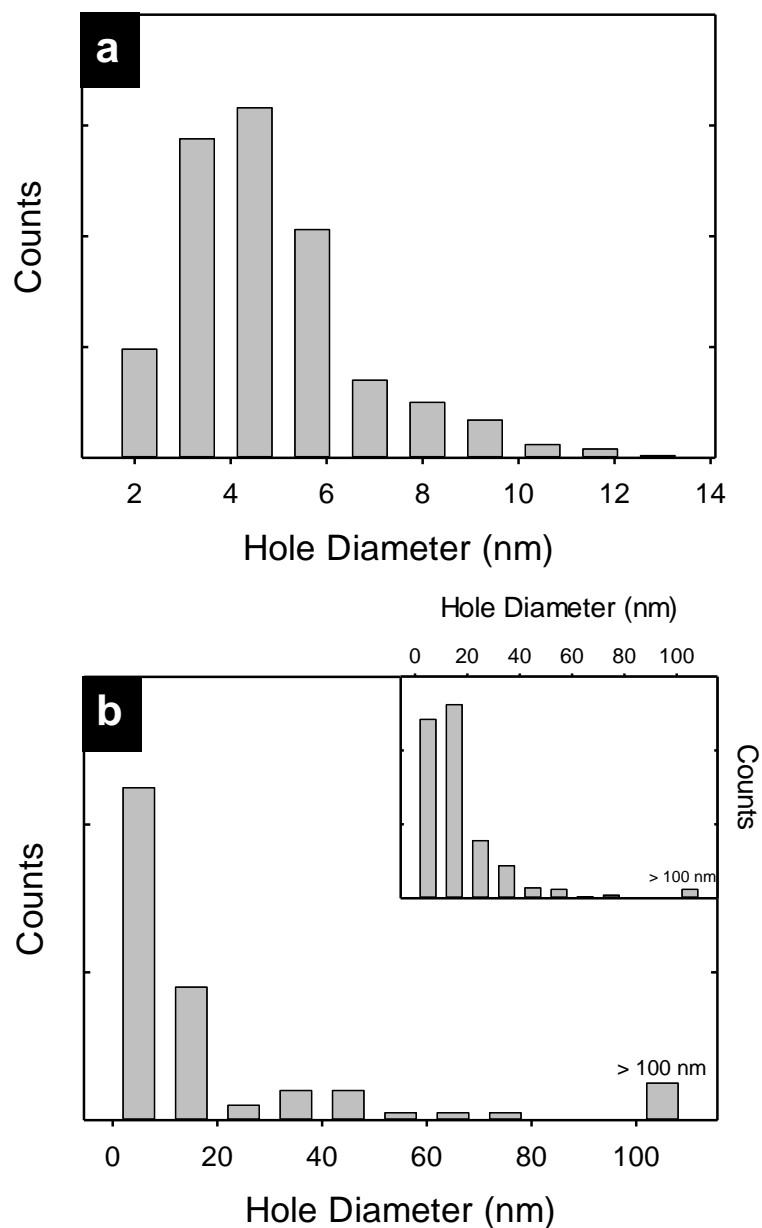

**Figure S2.** Size distributions of the holes in (a) a hG<sub>1</sub> sample ( $4.9 \pm 1.9$  nm) and (b) a hG<sub>10</sub> sample ( $21.5 \pm 31.5$  nm) – the same samples shown in Figure 6. Inset of (b) showed the size distribution plot of the hG<sub>10</sub> sample prepared in larger scale ( $18.2 \pm 20.2$  nm; corresponding to the same sample shown in Figure 9a).

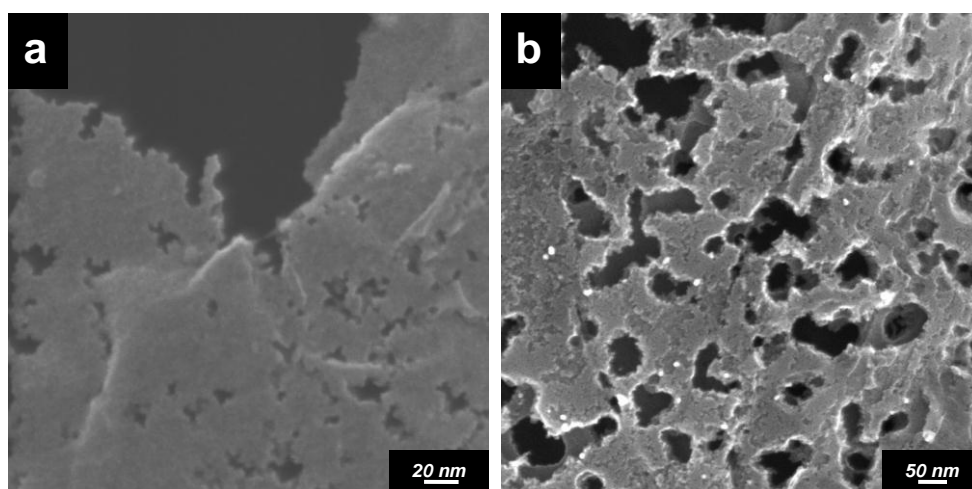

**Figure S3.** SEM images of (a) a hG<sub>1</sub> sample and (b) a hG<sub>10</sub> sample for which Step-II thermal treatments were both carried out at 350 °C in air for 3 h.

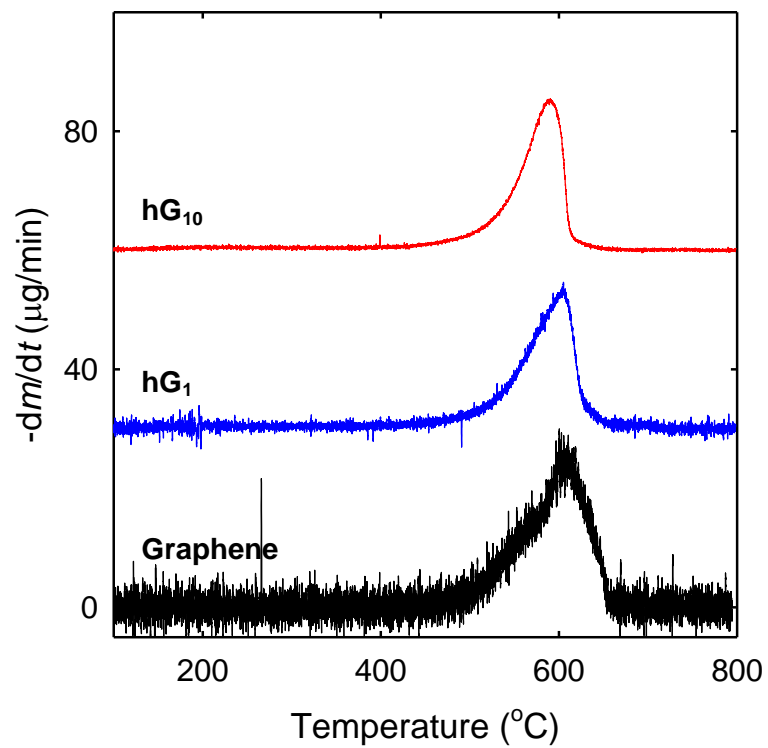

**Figure S4.** DTG curves (air, 5.4  $^{\circ}\text{C}/\text{min}$ ) of the hG<sub>10</sub> and hG<sub>1</sub> samples in comparison with the starting graphene sample.

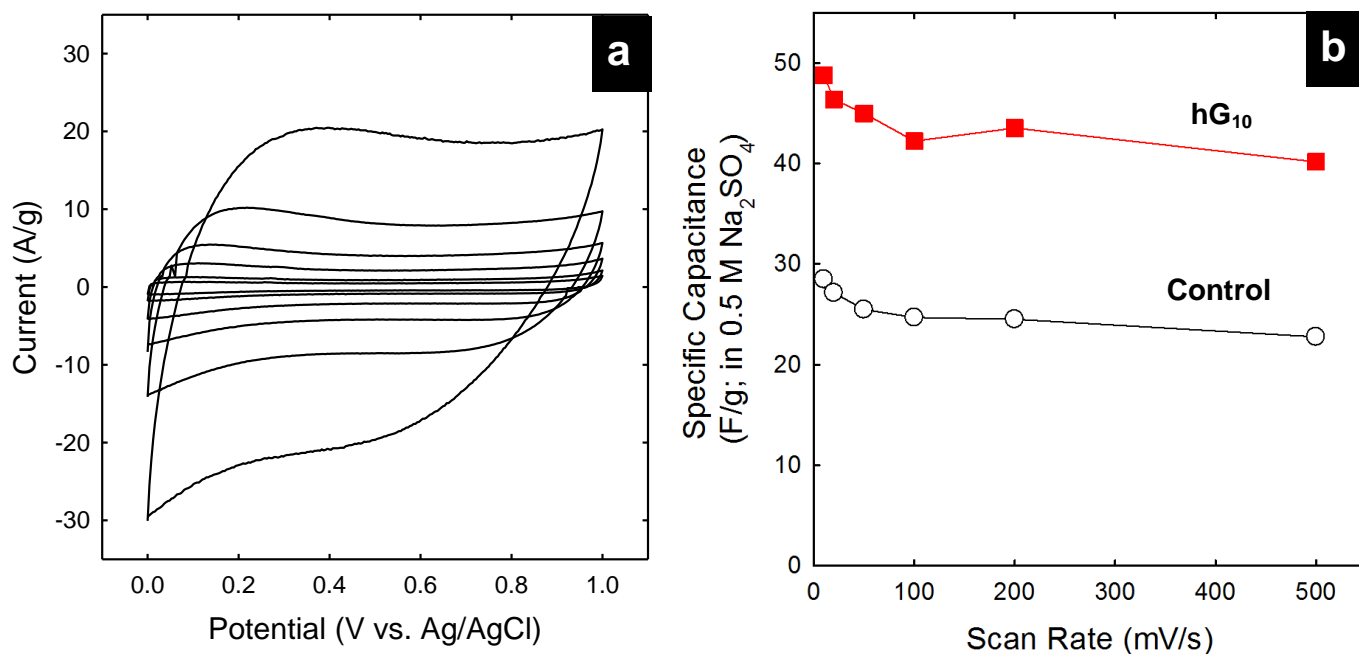

**Figure S5.** Preliminary electrochemical evaluations: (a) cyclic voltammetry curves of a hG<sub>10</sub> electrode at scanning rates from 10 (most inner curve) to 500 mV s<sup>-1</sup> (most outer curve). (b) specific capacitance values of hG<sub>10</sub> in comparison with those of a control graphene sample (with 2 h 2.6M nitric acid reflux only). The measurements were carried out in 0.5 M Na<sub>2</sub>SO<sub>4</sub> using three electrode configuration with Pt wire as the counter electrode and Ag/AgCl as the reference electrode. The working electrode was prepared by deposition of a drop of DMF dispersion of hG<sub>10</sub> (~15 μg) onto a conductive ITO slide (negligible capacitance) followed by drying in air.
